# Supplementary material for: The Total Carbon Column Observing Network's GGG2020 Data Version
Source: Copernicus journal article supplement (doi:10.5194/essd-2023-331), 2023-08-24
Supplement: Supplementary file [file essd-2023-331-AC1-supplement.pdf]

# The Total Carbon Column Observing Network's GGG2020 Data Version

## Response to Referee #1 (Denis Jouglet)

Joshua L. Laughner on behalf of all coauthors

February 26, 2024

Thank you to Dr. Jouglet for taking the time to thoroughly read our manuscript and provide detailed feedback. We have considered each comment; in most cases we have added material to address any noted confusion or ambiguity. In some cases, we elected not to do so to maintain the flow of the manuscript. Below, comments from Dr. Jouglet are in red, our responses are in blue, and quotes of the manuscript are in black. Unless otherwise stated, line, figure, table, and section numbers used in comments and responses refer to the *original* manuscript while such cross-references in quotes of the new version of the paper refer to the *revised* version.

This paper is not self-sufficient, since many rationales can only be found in previous papers: Wunch et al. 2010, 2011 and 2015. I think that scientists not familiar with the data cannot understand this paper on its own. I had to go back and forth to these papers. This would at least require systematic references to these papers (probably including the section, figure or table number), and in most cases a quick reminder (for example in a more detailed introduction).

We have tried to clarify such points as much as possible based on specific comments from all three reviewers.

Some assumptions made in these previous works are not fully described in these papers. In some cases, I was even not able to find the answer (see examples below).

We have done our best to address any specific cases noted by the reviewers.

The paper is very long. I think that all parts deserve publication, but it could be split or rearranged if possible (mostly the uncertainty budget).

We agree that it is very long, but our goal is that this be a reference for GGG2020, so we prefer to keep all piece together.

## Section 1

l 40: did you think of permanently removing channels in the center lines that become saturated at large SZA, so as to homogenize the biases along the SZA?

No, we do not expect this would give better results. This would give up information available from those line cores at smaller SZAs, which covers the most common times for satellites to observe.

l 48 : the assumption of “consistent across sites” seems to be in contradiction with Wunch et al 2011 appendix A.a (0.2ppm). Even if instrument are perfectly consistent, their different environments (boreal vs tropics) could translate in apparent inconsistencies.

The in situ correction is aimed only at removing systematic biases, which we expect to arise primarily from the spectroscopic parameters used in the retrieval and thus will be consistent across sites by construction. Instrumental biases from e.g. imperfect ILS would change over time, and so cannot be accounted for with the static in situ correction. We have edited this line to include:

“However, since all TCCON sites use the same retrieval (and thus the same forward model), we use a single mean scaling factor to remove the mean bias caused by errors in the spectroscopic parameters. **It is not intended to correct biases from instrument artifacts, such as an imperfect instrument line shape (ILS), as such biases can change over time.** The scaling factors for the various gases...”

l 58: be careful that the refraction effect may differ in the O<sub>2</sub> and the other gas windows.

Yes, but more so for instruments that use the A-band, which is farther from the CO<sub>2</sub> bands than the singlet-delta O<sub>2</sub> band TCCON uses, therefore path length effects will be smaller for TCCON than most satellite missions. Also, this effect will not introduce a significantly different path length for the direct-sun geometry TCCON measures in. We have added:

“Because O<sub>2</sub> and the primary TCCON gases are measured on the same detector, many biases related to the detector and pointing will be cancelled out (Wunch et al., 2011, Appendices A and B). **Note that TCCON uses the <sup>1</sup>Δ O<sub>2</sub> band around 7885 cm<sup>-1</sup>, rather than the A-band (around 13080 cm<sup>-1</sup>, commonly used by satellite missions to avoid interference from air-glow).** The <sup>1</sup>Δ O<sub>2</sub> band is closer in frequency to the near-IR CO<sub>2</sub> and CH<sub>4</sub> bands than the O<sub>2</sub> A-band; this minimizes differences frequency-dependent effects (e.g. scattering) between the O<sub>2</sub> and CO<sub>2</sub> or CH<sub>4</sub> bands.”

## Section 2

l 85 : I have a question a bit beyond the scope of this paper, but I did not get the answer in previous papers. What is exactly your definition of AK? In a bayesian framework, AK are usually defined as information coming from the measurement with respect to the prior. According to Wunch et al 2010 the retrieval is least square fitting of a scaling factor of an a priori profile, without an explicit value of any prior of this scaling factor and associated uncertainty.

We have added references to another source which describes these differences in more detail in the introduction:

“GGG retrieves trace gas column amounts by iteratively scaling an a priori vertical trace gas profile until the best fit between a spectrum simulated from those trace gas profiles by the built-in forward model and the observed spectrum is found. **(This differs slightly from the Bayesian framework described in Rodgers (2000). Please refer to section 3.4 of Roche (2021) for a discussion of specific differences.)**”

## Section 3

Large works have been done for improving spectroscopy, but no estimation of the gains on Xgas accuracy is given. Following section 7.1, they seem not to prevent the ACDF empirical correction. Can you provide an estimation?

We are in the process of carrying out a study to attribute the differences between GGG2014 and GGG2020 to specific improvements between the two versions. This question is better left to that study.

section 3.3: The O<sub>2</sub> column is estimated from the 1.27 $\mu$ m band (always this band?). The O<sub>2</sub> spectroscopic parameters are optimized so that Xluft, which is the ratio of O<sub>2</sub> column from spectroscopy to O<sub>2</sub> column from local pressure measurement, is close to 1 with low variance. Only the O<sub>2</sub> spectroscopic parameters are tuned, which means that the surface pressure measurement is assumed to be the truth. Therefore, why using the O<sub>2</sub> band and not directly the surface pressure measurement for the O<sub>2</sub> column estimation?

As mentioned in the introduction (immediately following Eq 1), because the O<sub>2</sub> window is measured on the same detector as the GHG species, certain types of instrumental error will cancel out between the columns. We have clarified this in the second bullet:

“It normalizes for path length. Observations at **higher** surface elevations will have smaller column densities compared to those from lower altitudes, due to the shorter vertical extent. Normalizing to the O<sub>2</sub> column removes this effect.

Because O<sub>2</sub> and the primary TCCON gases are measured on the same detector, many biases related to the detector and pointing partially cancelled out (**e.g. ILS, mis-pointing, zero-level offsets**, Wunch et al., 2011, Appendices A and B). Note that TCCON uses...”

section 3.3: you choose to change some spectroscopic coefficients from your empirical observations. This is fully understandable. Did you have any discussion about that with spectroscopists? Are your changes inside the uncertainties given by spectroscopists?

Yes, we discussed with spectroscopists and chose the range to vary the coefficients for temperature- and pressure- broadening to fall within the range of uncertainties for those parameters in the spectroscopic literature. We have noted this in the revised text:

“In each test, we scaled the temperature dependence, pressure dependence, or both of all lines in the O<sub>2</sub> band, **covering a reasonable range of estimates from the literature.**”

l.173: You choose to use only one value, T700, but the temperature vertical profile may be heterogeneous, in particular in the boundary layer. Do you not think that this approximation could be source of error?

We chose T700 specifically to avoid variations near the surface, as we expected that those variations would be limited to the bottom 1 km (10%) of the total column, and less correlated with synoptic scale changes affecting the free troposphere (60% to 70% of the column). The challenge is that, as we only retrieve a single piece of vertical information, we need a temperature metric related to the majority of the column. We are beginning a new study to investigate spectroscopic biases in other gases, and plan to revisit O<sub>2</sub> in this study as well. We have included our rationale for using T700 in the revised manuscript:

“T700 is taken from the a priori meteorology data, **and was chosen on the assumption that this is a reasonable metric for temperature variations in the free troposphere containing the majority (~ 60%, 800 to 200 hPa) of the O<sub>2</sub> column.**”

fig 2: In panel (b) a slope can still be observed.

Correct, we were not able completely removed the temperature dependence, only reduced it in magnitude. The last sentence of sect. 3.3 stated this; we have made it clearer that the slope is not zero:

“The effect on the  $X_{\text{luft}}$  vs. T700 relationship is shown in Fig. 7b, **where although not reduced to zero**, the slope is reduced by a factor of 4 compared to its pre-optimization value.”

## Section 4

Do you not think that cross-sections computed for interpolated met profile for each hour of a day would provide an improvement in the retrieval?

Perhaps. However, as GGG is designed, this would require recalculating absorption coefficients even more frequently, so we chose to balance the computation speed and time resolution of the met data.

## Section 5

l.242: Does detector saturation often happen? Why do you not adjust the gains to the maximum possible intensity of the place? This is quite deterministic, depending mostly on AOD (not strongly on SZAs in the SWIR when AOD is low and SZA not at extreme values).

As stated in Sect. 5, TCCON sites already have adjusted pre-amplifier gains and beam intensity to avoid detector saturation, so large detector saturations are typically rare, and normally found and fixed shortly after installation. The flag is implemented both to ensure that these rare saturation events do not get processed, and to help PIs identify the problem quickly. We have added a sentence indicating that the large saturation effects are rare:

“We have implemented a check early in i2s processing to remove interferograms affected by detector or signal chain saturation, an extreme form of detector non-linearity... We call this “detector saturation” and this causes irreversible detector nonlinearity in which spectral information is permanently lost. **Detector saturation is rarely found in the TCCON spectra, and is straightforward to resolve once it is identified. We do this in two ways: (1) detectors used for TCCON measurements have reduced pre-amplifier gain settings and (2) we limit the number of photons incident on the detector...**”

1.243: In such saturation cases, only the very low frequencies are lost. These frequencies are mostly retrieved by the continuum fitting and should not bring information on gases. Do you think that gas information is lost in such configuration?

Detector saturation is an irreversible problem (unlike small detector nonlinearities, discussed later in the manuscript), and the retrievals from spectra affected by detector saturation produce nonsensical results. Detector nonlinearity, if small, is reversible. However, we do expect nonlinearity to affect the retrieved gas columns. The nonlinearity causes a zero level offset, which alters the line depths by lowering the continuum. Sha et al. (2020) identified an example of how the subtle nonlinearity at Sodankylä introduced a bias in the XCO<sub>2</sub>. We have added a sentence between the paragraph on detector saturation and detector nonlinearity to make clear which type of nonlinearity we are referring to:

**“There are more subtle detector nonlinearity effects that do not result in detector saturation, but can adversely affect the retrievals. We now compute and store a detector nonlinearity diagnostic variable (“DIP”)...”**

## Section 6

Is there no interference between the instrument continuum fitting and the O<sub>2</sub> 1.27 $\mu$ m CIA when using polynomial orders greater than 2? The CIA brings much information on O<sub>2</sub> amount.

Yes, there is some interference. But the shape of the CIA absorption is fixed by spectroscopy, whereas the shape of the continuum is fitted. We also point out that the O<sub>2</sub> CIA absorption contribution is fitted separately from the contribution from the discrete O<sub>2</sub> lines. The O<sub>2</sub> retrieved from the CIA is not used, due to the possibility of interference with continuum.

## Section 7

Section 7.1: can you confirm that the new ADCF are computed on the Xgas benefiting from the O2 spectroscopic improvements of section 3.3?

We have added:

“The second is an in situ-based, or airmass-independent correction (§8.3), which aims to eliminate the mean bias in  $X_{\text{gas}}$  values arising from incorrect spectroscopic line strengths. **These corrections are calculated from data that includes all improvements discussed in the preceding sections.**”

1.395: you consider the temperature dependence of the ADCF as “spurious”. I think this a hypothesis (like symmetry of Xgas with respect to noon in equation (5)) that requires to be identified as is. Can natural phenomena not also be responsible for such trends? Probably seeing this effect on some but not all windows of a trace gas could enforce the spurious hypothesis.

We acknowledge that this could be a real change in the atmosphere, though it is highly unlikely because of the differences between windows (as you said) and because the ADCF is constructed to focus on changes in Xgas that are symmetric about solar noon, which natural processes are unlikely to match. We have added this to the end of Sect. 7.1:

“The final step in selecting ADCFs for GGG2020 was to account for **potentially** spurious temperature dependence in the  $X_{\text{gas}}$  values. As we saw with O<sub>2</sub> in §6.3, incorrect temperature dependence in the line widths introduces a temperature dependence in retrieved  $X_{\text{gas}}$ , which could alias into the airmass dependence. **While we acknowledge that such temperature dependence of the ADCFs could be due to a real change in the atmosphere, we believe this to be unlikely for two reasons. First, the ADCF is constructed to account only for variations in Xgas that are symmetric around solar noon, and generally changes in atmospheric composition are not perfectly symmetric around solar noon. Second, as we show in Fig. 13, different windows for the same gas have different relationships between the ADCF and temperature. A real change in atmospheric composition would be more likely to show up in all windows for a given gas.**”

In section 3.3 you update the O2 spectroscopic coefficients, using O2 from the pressure sensor as the truth to fit. Here in section 7.1, why do you not do the same optimization exercise for the spectroscopic coefficients of trace gases, rather than a posteriori empirical correction? This would require an external truth which could be the in situ measurements of section 7.3. L.406 mentions this plan for temperature dependence but could be enlarged to SZA dependence.

We have left the optimization of the CO2, CH4, etc. spectroscopic coefficients for future work because we did not identify a truth metric for the optimization until after GGG2020 had

entered final testing. We will investigate whether optimizing the spectroscopic coefficients using a similar approach as we did for O<sub>2</sub>, but using the slopes of ADCF versus temperature as our quality metric, can reduce the SZA- and temperature- dependent biases. While the in situ data used later in the paper might be a possible truth metric, we would need to evaluate whether there are enough in situ profiles to reliably correct the spectroscopic errors leading to SZA dependence.

Section 7.1.1: you remove the windows that are the more affected by the temperature dependence. What is your threshold for the decision of correcting or removing?

We did not have a predetermined threshold; our rationale are explained in the text of Sect. 7.1.1 (now §8.1.1). For the wCO<sub>2</sub> and CO windows, one window had a clearly larger temperature dependence than the other, and we had reason to suspect stronger water interference in the windows with larger temperature dependence. For the HCl windows, we also tried to identify windows with strong water interference, but as stated in the text, removed two additional windows as special cases.

Section 7.3: I would like to understand the differing results of GGG2014 and GGG2020. In 1.455, what are the differences between the in situ dataset used for GGG2014 and that for GGG2020? Do you expect changes / improvements in your AICF estimation with the GGG2020 dataset? Larger variety of in situ instrument to vary the potential biases; larger range in weather conditions to disangle trends?

For GGG2020, we reconstructed our suite of in situ profiles from NOAA ObsPack data, whereas previously we had used individual campaigns' data files. This has several benefits, but means that a profile-by-profile comparison between GGG2014 and GGG2020 is not simple to describe. We do expect improvements to the AICF with the new dataset, primarily from updates to the spectroscopic parameters. However, the primary purpose of the in situ correction remains to tie remotely sensed GHG data to the same measurement scales as the in situ data. We added a paragraph to Sect. 7.3 (now §8.3) explaining this:

“The use of ObsPack data represents a slight methodological change compared to GGG2014. Most of the in situ aircraft profiles used for the GGG2014 in situ correction are included in the ObsPack, and switching to the ObsPack instead of individual campaigns' data files will allow us to use the same tools to ingest future new profiles added to the ObsPack. This also allows us to benefit from the data curation and quality control efforts of the ObsPack team. With the larger number of profiles now available (especially for CO<sub>2</sub>), we are able to test for correlations with potential sources or metrics of bias. However, the primary purpose of the in situ comparison remains to tie TCCON (and through TCCON, satellite) GHG data to the same metrological scales as in situ GHG data.”

What is the size of the GGG2020 in situ data set? And thus the number of elements in fig 11? OK this is answered in table 2, but should be given in plain text.

Since each gas has a different number of profiles, we prefer to keep this information in tabular form. We have added a reference to table to in the now second to last paragraph before sect. 7.3.1:

“Due to the relative sparsity of N<sub>2</sub>O profiles, GGG2020 TCCON N<sub>2</sub>O products were evaluated against surface N<sub>2</sub>O data and a different approach, which will be covered in §8.3.3. **The number of usable profiles for each gas is given in Table 2.**”

The appendix C6 is very important for this paper. It would be useful to give orders of magnitudes of the several sources of uncertainties (partially given in table 3).

We have moved the individual error terms from Table 3 to a new table in appendix C and added the two TCCON-related error terms.

Appendix C6 1.1213: Why do you take twice the std and not the std itself?

This to be conservative about the uncertainty from random terms in the overall error. The exact multiple should not matter substantially, as we use two sigma consistently in all parts of the uncertainty calculation. We have added this to the first paragraph of appendix C6:

“For the TCCON/in situ ratios in §8.3, we considered five sources of uncertainty for the comparisons. **We chose twice the standard deviation as our metric for deriving uncertainty (rather than  $1\sigma$  to be conservative), and use that consistently for all random error terms.**”

1.518: I agree the presentation of fig11 is better than the older presentation (fig5 in Wunch et al 2010, fig.8 in Wunch et al. 2015). Please precise that the in situ ratio of the fig11 is equivalent to the inverse of the slope of the best fit of older papers.

The ratios from Fig 11. are *not* the inverse of the slopes from Wunch et al. 2010 and 2015, both the slopes and the ratios are TCCON/in situ. We have added a sentence in the paragraph following the enumerated uncertainty sources:

“The use of TCCON to in situ ratios to derive the in situ correction is equivalent to the best fit lines forced through the origin used in Wunch et al. (2010), as the best fit line through the origin is essentially the mean TCCON to in situ ratio. **As in Wunch et al. (2010), a ratio (or slope in Wunch et al. (2010))  $> 1$  indicates TCCON  $X_{\text{gas}}$  values are biased high relative to in situ, and vice versa for ratios  $< 1$ .**”

1.524: Here for CO2 the ratio is 1.01%, whereas in Wunch et al. 2010 fig5 and in Wunch et al. 2015 fig8 it was 1.1% (1/0.989). Can we conclude that the updates of the GFIT processing and the new ADCF described in this paper have provided such a 10% improvement? If so, please emphasize it. If not, please explain why (the values are comparable since the data set are different).

As noted above, the ratios and slopes are directly comparable, so in Wunch et al. 2015, the retrieved pre-in situ correction XCO2 was 1% low compared to in situ, and here it is about 1% high. We would not expect the ADCF to change the mean this significantly; however full attribution will be done in an ongoing study. We have added a new paragraph in Sect. 7.3.1:



“Additionally, we note the TCCON  $X_{\text{CO}_2}$  product changed from being 1% low compared to in situ (pre-in situ correction) in Wunch et al. (2015) to 1% high here. We would expect this to be due to changes in spectroscopy, such as an average decrease in  $\text{CO}_2$  line strengths or increase in  $\text{O}_2$  line strengths. However, we are in the process of conducting a full attribution study for all the component changes between GGG2014 and GGG2020, and reserve a final conclusion until that is complete.”

1.627: I think “small” is a bit under-evaluated, since for 420ppm the order of magnitude is the same as the one of the new XCO2 scale.

Since both changes are of order 0.1 to 0.2 ppm, ”small” seems appropriate. However, we have modified this sentence to read:

“For  $X_{\text{CO}_2}$  values around 400 ppm, **the change is of similar magnitude to the WMO scale change** for  $\text{CO}_2$  products.”

As already mentioned in my “general comments”, this section is very interesting in terms of metrology. I would interpret section 7.1 as a correction of intrinsic quality of the detector (removing all artifacts regardless the conditions), and section 7.3 as the absolute calibration of the sensor (more precisely fit to WMO standard). In previous papers, only air mass dependencies were corrected. But now we can see that the list of potential dependencies for intrinsic quality is larger: ADCF in section 7.1, atmospheric temperature dependency in section 7.1, impact of  $X_{\text{gas}}$ . [the classical  $X_{\text{gas}}(\text{TCCON}) = f(X_{\text{gas}}(\text{in situ}))$  (like fig.8 in Wunch et al. 2015) have been discarded in this paper (section 7.3), this implicitly mean that TCCON is linear with  $X_{\text{gas}}$ ], impact of  $X_{\text{luft}}$  as seen by section 7.3 fig.11 (1.555 mentions that it will be a future update). Maybe the paper should be more explicit about this “metrological” process. As a consequence, and depending on the size of the section 7.3 data set, I think other dependencies could be looked for (humidity, AOD, altitude, etc.).

To be clear, the post-hoc corrections are still limited to the air mass dependent correction and the scaling to match in situ data. The only temperature corrections were done by updating the  $\text{O}_2$  spectroscopic parameters, so we consider that an empirical adjustment to the forward model physics rather than a post hoc correction. Additionally, we are now identifying new sources of uncertainty not because they did not exist before, but because we have reduced other sources of uncertainty that allow us to identify these new ones and because the need for greater precision in remotely sensed GHG products from the scientific community is driving us to identify ever smaller errors. I am not clear why is meant by “ $X_{\text{gas}}(\text{TCCON}) = f(X_{\text{gas}}(\text{in situ}))$ ” and “TCCON is linear with  $X_{\text{gas}}$ ” in the third bullet point. In Wunch et al. 2015, the relationship between in situ and TCCON  $X_{\text{gas}}$  values was a linear fit with the intercept forced through 0, which is equivalent to the mean ratio of TCCON/in situ we use here. Both Wunch et al. (2015) and this work assume that bias between TCCON  $X_{\text{gas}}$  and in situ  $X_{\text{gas}}$  values will be multiplicative because of the nature of biases in retrieved columns arising from errors in the average spectroscopic line strengths, thus a ratio of TCCON/in situ values is the correct way to calculate and correct those biases. We are also working with a colleague at the National Institute of Standards and Technology

who is very interested in improving the metrology of remote sensing GHG products. As the NIST group develops the appropriate framework for such metrology, we are happy to participate in future efforts to more rigorously document the chain of references. Regarding other dependencies, we have looked for other correlates with the TCCON/in situ bias, but have not found strong evidence for drivers other than SZA and temperature. This does not mean such drivers are absent, only that the in situ dataset is not sufficient yet to identify them. We have added a sentence to the beginning of Sect. 7.3:

“As in GGG2014, the GGG2020  $X_{\text{CO}_2}$ ,  $X_{\text{CH}_4}$ ,  $X_{\text{N}_2\text{O}}$ , and  $X_{\text{H}_2\text{O}}$  products are tied to standard scales by in situ aircraft, balloon, and/or radiosonde measurements to remove any mean multiplicative bias introduced by error in absorption line intensity. **As the absorption of a gas is the product of its column density and spectroscopic cross section, a bias in the mean line intensity (and therefore the cross section) will by definition lead to a multiplicative bias in the simulated absorption and thus the retrieved column density.**”

## Section 8

1.758: it is written that surface pressure measurement is used for calculating the total column of air, whereas previously it was said that the O2 absorption band is used for that purpose, this is contradiction.

We have revised this to:

“The surface pressure measurements we collect as part of our on-site meteorological data are important for **determining the bottom altitude when integrating the total columns.**”

1.784: do you not think that after the works done in section 7.1, it could be possible to add the spectroscopic errors as an uncertainty source?

No, spectroscopic errors will usually manifest as a static bias or one covarying with atmospheric parameters, rather than a random uncertainty source. We remove these errors to the best of our ability with the airmass dependent correction and in situ correction, and spectroscopic uncertainties are considered in the comparison between TCCON and in situ data at the end of section 8. These uncertainties will fall out during those corrections. We have noted this in a new paragraph at the end of the list of error terms considered in Sect. 8, subsection “Other sources of error”:

“This error budget does not include radiometric noise or spectroscopic errors. We omit radiometric noise because Wunch et al. (2011) showed that random noise does not introduce a bias in  $X_{\text{CO}_2}$  because TCCON spectra have a high signal-to-noise ratio due to the direct-sun viewing geometry and the strength of our target gases’ absorption lines. **We omit spectroscopic errors in this section because mean and SZA-dependent spectroscopic errors are removed by the post processing corrections (§8.1, §8.3).**”

1.784: It would be interesting to get an inter-instrument budget beside the single instrument budget. This would be very useful since one of the use of the network is to analysis spatial gradients. For example, error in the retrieval like the choice of the prior will be partially common to all instruments (partially because it may depend on latitude). Some errors (pointing error, FOV error) will be different from an instrument to another.

The challenge is that such an analysis either needs a transfer standard or some external assumptions (e.g. models) to distinguish between inter-site differences due to real differences in atmospheric composition and those due to differences in the instruments. This is something being explored through the use of an EM27 as a travel standard.

1.868: the classical way would be to use the standard deviation, please explain why you use the median absolute deviation here (robustness to outliers?)

Yes, here we prefer MAD because it is less sensitive to outliers and we need a robust estimate of the TCCON vs. in situ difference, and do not need the properties of Gaussian error statistics. Also, this was "mean absolute deviation", not "median". We have corrected that typo and clarified the rationale for choosing MAD as follows:

"For the in situ uncertainty, we use the median absolute deviation (MAD) of the TCCON  $X_{\text{gas}}$  values from the in situ  $X_{\text{gas}}$  values after removing the mean bias for each  $X_{\text{gas}}$  (i.e. the correction factor in Table 4). **We use MAD over standard deviation because it is less sensitive to outliers.**"

1.878: In your sensitivity study (first part of section 8), you did not include the radiometric noise, which would be the main random error source. Most sources you considered should be quite constant over a day, so the assumption of reduce sources of random error sounds good to me. Be careful however that some sources of your sensitivity study could be slowly variable and therefore mostly seen in the mean bias, not in the median absolute deviation.

We did not include radiometric noise because Wunch et al. (2011) had previously shown that random noise had little effect on XCO<sub>2</sub>. We have noted this in a new paragraph at the end of the list of error terms considered in Sect. 8, "Other sources of error":

**"This error budget does not include radiometric noise or spectroscopic errors. We omit radiometric noise because Wunch et al. (2011) showed that random noise does not introduce a bias in  $X_{\text{CO}_2}$  because TCCON spectra have a high signal-to-noise ratio due to the direct-sun viewing geometry and the strength of our target gases' absorption lines. We omit spectroscopic errors in this section because mean and SZA-dependent spectroscopic errors are removed by the post processing corrections (§8.1, §8.3)."**

table 3 and 1.883: In "Mean abs. dev." there is the contribution of the instrument, of the in situ measurement and of the comparison between both. Do you not think you should compare "Mean abs. dev." with the quadratic summation of "Error budget" and "Epsilon\_insitu", rather than "Mean abs. dev." with "error budget"?

Yes, that is a good point. We have updated the table (now Table 5) to include the quadrature sum and modified the text to use that comparison instead.

# Clarity

## Sect. 1

This introduction should be expanded, and divided into several sub-sections: (1) It should recall the main uses of the TCCON network (as given in the abstract). (2) It should explain that the scope of this paper is to describe the major changes from GGG2014 to GGG2020, justify why so hard work has undertaken. The expected accuracy for GGG2020 and the current performance of GGG2014 would be the best rationale. (3) Introduction should also reference to Wunch et al 2011 and 2010, since the major parts of the algorithm are described in the 2011 paper. (4) I think the complete window definition should be recalled in a table (or at least referenced) in introduction or in appendix. This will ease the comprehension of section 2 by newcomers (useful also for 1126), and also give the current status. (5) Introduction should recall the main steps of the retrieval (Bayesian approach or not?), including the cross-sections computation and the AK definition, so as to make the paper more self-consistent. (6) L 75: maybe the introduction should also mention the systematic quality check done by the central facility? Does it include the filterings listed in section 7.3?

We have implemented some of these suggestions.

1. Common applications of TCCON data were already given in the first paragraph of the introduction
2. We have added a sentence stating the purpose of this paper to the 5th paragraph of the revised introduction, and a new second paragraph describing the motivation for the update.
3. We have added a “see also” reference to Wunch et al. 2010 and 2011 in the 5th paragraph of the revised introduction.
4. The windows have been added as Tables A2 and A3 in the appendices.
5. We now state that the approach in GGG differs slightly from the standard Bayesian approach in the 6th paragraph and provide a reference with more details. The AK computation is not done as part of typical GGG processing (they are precomputed), so we have not included that here.
6. We now state “This data undergoes quality evaluation before release, with all data reviewed by experienced TCCON members from various sites.” in the second to last paragraph of the revised introduction. Sect. 7.3 only pertains to the in situ correction; any filtering described there is separate from the standard QC process.

Description of the new merge of several windows of line 30 is redundant with section 7.2 and therefore could not be mentioned in introduction. I was not able to find the way several windows were merged in previous papers.

We prefer to keep this in the introduction as well, since it is part of the data processing sequence being laid out there.

It is not clear in sections 1, 7.1 and 7.2 whether the ADCF correction and the window merging is performed on column densities or on column average dry mole fraction (1.52). Please clarify.

We have changed an earlier sentence to make the order of operations clear:

“The post processing step includes **the conversion from column densities to column-average mole fractions, followed by** the above window-to-window averaging, an empirical airmass-dependent correction, and a scaling correction to tie TCCON data to the relevant calibration scales.”

Please precise that  $V_{\text{gas}}$  and  $V_{\text{O}_2}$  are column densities, and give the physical unit.

We have added the units of molec/cm<sup>2</sup>

l 45: can you give a reference for the 0.25%?

We’ve removed the 0.25% here because we are discussing all gases generally, which have different requirements. We have added a paragraph earlier in the introduction that includes citations for the CO<sub>2</sub> requirements.

The “scaling factor” or “scaling correction” could already be named AICF, and the “empirical airmass-dependent correction” ADCF.

We prefer to introduce the concepts without the later jargon here.

## Sect. 2

People knowing the CO<sub>2</sub> spectroscopy could wonder why the weak window at 6536cm<sup>-1</sup> is not mentioned, maybe you can refer to section 7.1.1 l.415 which brings the explanation. Same for the 4905cm<sup>-1</sup> strong CO<sub>2</sub> band.

We have added a short paragraph to Sect. 2 with this information:

“For wCO<sub>2</sub>, we chose not to use the second weak band around 6500 cm<sup>-1</sup> for reasons detailed in §8.1. For lCO<sub>2</sub>, we did not use the strong band around 4900 cm<sup>-1</sup> because the lines are so strong that the retrieval would be more sensitive to errors in the line shape and zero level offsets in the interferograms.”

To what the “l” of “lCO<sub>2</sub>” refers to? In the OCO-2 mission, such band is called sCO<sub>2</sub>, and the 6300cm<sup>-1</sup> bands to wCO<sub>2</sub>, which is confusing here.

We have added mnemonics to the first paragraph of Sect 2:

“We refer to these as “lCO<sub>2</sub>” (for “lower” CO<sub>2</sub>) and “wCO<sub>2</sub>” (for “weak” CO<sub>2</sub>), respectively.”

Maybe the “CO<sub>2</sub> window centered at 6220 cm<sup>-1</sup>” (l.119), which is the first standard window, should be given a short name as it the case for sCO<sub>2</sub> and lCO<sub>2</sub>?

No. The 6220 and 6339 windows make up the standard TCCON CO<sub>2</sub> product, so these windows should be referred to as “CO<sub>2</sub>” with no prefix letter, as was the case in GGG2014, for continuity.

## Sect. 3

For clarity, I think a chapter named “Improvement of the forward model and the retrieval” should be created to include sections 3, 4, 5 and 6. The following sort would be more obvious : 5, 4, 3, 6.

As it is atypical to include chapter level organization in a paper and these sections do address distinct parts of GGG, we have kept them as individual sections. However, we have adopted the suggested order and added a new figure with a flowchart of the components of GGG and the data delivery (new Fig. 1).

L 114 : give a reference for “Numerous spectroscopic studies”?

We have added references to Tran et al. (2013), Hartmann et al. (2009), and Gordon et al. (2017).

L149 : Xluft is an important notion, but new and never mathematically defined (later it is said “similar to Xair”). Please give the mathematical formula of Xluft.

We have added one as the new Eq. (4).

## Sect. 4

Please recall (in introduction?) that the absorption cross-sections are pre-computed, using the meteorological profiles. Despite the 3-hourly new product, can you confirm in the plain text that only one profile per day is used?

We do not use one profile per day in GGG2020, we now use the nearest 3-hourly profile in time. We have added a new sentence to Sect. 4.2 to clarify:

“GGG2020 uses the nearest profile in time, changing every three hours, to better capture changes throughout the day.”

## Sect. 5

section 5.2: I cannot catch the improvement of GGG2020 with respect to 2014 in this section.

This was the reduction in the phase correction threshold, described near the end of the section. We have made the change its own paragraph so it is easier to find.

section 5.3: I was not able to find in literature (Wunch et al. 2011, 2015) that the TCCON interferometer is single—sided. Please mention it (introduction?), and provide the length of the short arm (as well as that of the long arm).

TCCON sites must have a maximum optical path difference of at least 45 cm, but may choose to use a longer max OPD if they wish. Therefore there is not a single arm length to give. The length of the short arm varies considerable between sites, from 0.1 to 5 cm. But this doesn't matter because the current processing discards almost all the short side. We have made explicit in Sect 5.3 that TCCON spectrometers are single passed:

“We now make better use of the entire interferogram collected by the spectrometer in i2s. In typical linear single-passed Fourier transform spectrometers (**such as those used by TCCON**),”

Note that TCCON interferometers are single-passed and record single-sided interferograms. EM27/SUNs, on the other hand, often record double-sided interferograms. It is only for double-sided interferograms that we use the short side of the interferogram. We have clarified this:

“I2S now has the capability to process interferograms as single sided (using data only from one side of ZPD, usually the long arm) or double sided (using data from both sides of ZPD, the long and short arms). When processing an interferogram as double sided, the optical path difference (OPD) on either side of ZPD must be the same. This means that for standard TCCON processing, I2S will always choose to process the interferogram as single sided, because the long arm is much longer ( $\geq 45$  cm) than the short arm (typically 0.2 to 5.0 cm). However, for spectrometers such as the EM27/SUNs where the OPD is more symmetrical about ZPD, I2S can process the interferogram as double sided, which avoids discarding useful data from the short arm.”

L 309: please explain why it is “more efficient” : is it for a better SNR?

It simply avoids discarding part of the interferogram unnecessarily. We have clarified this:

“I2S can process the interferogram as double sided, **which avoids discarding useful data from the short arm.**”

L 312: “spectral response of the instrument” is ambiguous, may be confused with ILS. I understand you are talking about the instrumental “continuum”.

We have added a footnote clarifying the distinction between “spectral response of the instrument” and “ILS”:

“Here, by “spectral responses of the instrument,” we mean an instrument-specific response which can be characterized as a frequency-dependent vector that multiplies the incoming solar spectra. This is distinct from the ILS, which is instead best considered as an instrument-specific vector that convolves the incoming solar spectra.”

L 320: “the discrete Legendre polynomials” is not mentioned in Wunch et al 2015. Do you confirm it? Why Legendre polynomials and not classical polynomials?

Yes, we use Legendre polynomials, as they have useful properties, the most important being that they are orthogonal. In a classical polynomial (i.e.  $y = a + bx + cx^2$ ) the coefficients are not orthogonal. We have noted this in Sect 7 of the revised paper now:

“Higher order **Legendre** polynomials are now used widely in the GGG2020 spectral windows to better account for continuum shape changes between instruments and over time. **(We use Legendre polynomials because they are orthogonal, whereas standard polynomials are not.)** The continuum curvature fitting option...”

Please give the orders used per window (or at least their maximum).

We have added new tables A2 and A3 and reference them in what is now §7.

## Sect. 7

Section 7.1: sub-sections would be welcome

We have split this into subsections for ADCF approach changes and derivation.

I think that equations (3), (4) and (5) cannot be understood without an explicit reference to Wunch et al 2011 appendix A.e.i (1356 mentions “like GGG2014” but Wunch et al 2015 does not mention it). Please refer to it. Please recall that  $f$  is a model for the observed  $X_{\text{gas}}$  diurnal variation, making the important assumption that any symmetrical  $X_{\text{gas}}$  variation around noon is not expected to be true but an artifact.

We have added this reference and a note about the assumption of symmetrical behavior:

“GGG2020, like GGG2014, applies a post hoc correction to the  $X_{\text{gas}}$  values to remove airmass dependences. This correction is applied to each  $X_{\text{gas}}$  value. **It has a similar form to that in Appendix A of Wunch et al. (2011)...**”

“...where  $t$  and  $t_{\text{noon}}$  are the measurement time and solar noon time (in day of year),  $f_c$  is the polynomial defined in Eq. (5), and  $c_{\text{mean}}$ ,  $c_{\text{asym}}$ , and  $c_{\text{ADCF}}$  are the fitted coefficients. **This equation assumes that symmetrical variation of  $X_{\text{gas}}$  values around noon (fit by  $f_c$ ) are due to spectroscopic errors and real variations throughout the day are antisymmetrical and will be fit by the  $c_{\text{asym}}$  term....**”

I think an illustration of  $X_{\text{CO}_2}=f(t,\theta)$  with several examples would be welcome, and also to show the standard deviation that is aimed at being minimized.

It is not the standard deviation of  $X_{\text{CO}_2}$  being minimized but the standard deviation of the ADCF. This is already illustrated in Fig. 6 (now Fig. 11).

I note that despite Wunch et al 2011, the  $\sin()$  function is replaced by a linear function, why?

The sin function was just missed in entering the equation, it has been fixed. Thanks for catching that.

l.383: please precise how you get these uncertainties.

We have added a short explanation:



“The coefficients and their errors are calculated with a weighted least squares fit using the individual windows’  $X_{\text{gas}}$  uncertainties (**calculated from the spectral residuals of the target gas and  $\text{O}_2$** ) as the weights.”

I 395: As far as I understand by comparison with previous papers, this temperature dependence correction is new in GGG2020. Please emphasize it.

We have added two bullet points at the beginning of the section to highlight this:

“In GGG2014, only data from 3 TCCON sites (Park Falls, Lamont, and Darwin) were used to compute the ADCFs. For GGG2020, we use 18 sites’ data....In GGG2014, we did not examine the ADCF for temperature dependence. We do in GGG2020 and attempt to account for that in how we select the final ADCF values.”

I 399: The use of the theta notation for potential temperature is source of confusion since theta is use earlier for SZA. Maybe you should change it.

We now use “SZA” instead of theta for solar zenith angle

L.402: please detail the exact operation: division by the ACDF at  $\theta_{\text{mid}}=310\text{K}$ ? linear correction requesting the knowledge of  $\theta_{\text{mid}}$ ?

There is no operation, the value of the fit at 310 K *is* the ADCF. We have done our best to clarify:

“For each window, we use the value of the fit to this data at  $\theta_{\text{mid}} = 310 \text{ K}$  as the final ADCF value.”

L.419: in this paper, as well as in previous papers, HCl was never mentioned as an atmospheric gas measured by TCCON (see table 3 of Wunch et al 2015), but only as for the gas cell for interferometer calibration. The mentioned windows should therefore be explained.

We have added:

“Lastly, we also removed a number of HCl windows. **TCCON instruments use HCl lines to assess instrument alignment with an HCl cell that can be illuminated by the solar beam or an internal lamp.** TCCON used 16 windows to measure HCl in GGG2014...”

Section 7.2: after reading the Wunch et al. 2015, 2011 and 2010, I was not able to find the way windows were merged in GGG2014 and older. I do not fully understand the iterative process described here. Please detail it.

GGG is open source software. Users interested in this level of detail are encouraged to download the software and examine the algorithm themselves. Because we do not use the iteration in GGG2020, we do not wish to distract from the main point of this section.

1.432: you mention the “retrieval error”, previous papers seems not to define it. I think it should be given in section 1.

Changed “retrieval error” to “spectral residuals”.

1.472: please give the formula of the FVSI index (or give a reference). Is it computed for a single scan duration? What is the duration of a single scan? (it can be mentioned in section 1)

We have added:

“This is the standard deviation of solar intensity divided by the average solar intensity during the  $\sim 80$  s long scan, and filters out observations impacted by intermittent clouds.”

1.481 also requires to mention the duration of a single TCCON duration, so as to understand whether 30 TCCON is a large part of a 2h window or not.

We have added:

“For each in situ profile, we require **at least** 30 TCCON observations (**each**  $\sim 80$  s) passing these quality checks”

1.495: I guess  $a_i$  is the averaging kernel, please clarify it.

We have added the symbols used for each term in parenthesis within the text:

“ $\delta\mathbf{x}$  is the difference between the in situ ( $x_{\text{insitu},i}$ ) and TCCON posterior ( $x_{a,i}$ ) profiles, modified by the TCCON averaging kernel ( $a_i$ ):  $\delta x_i = a_i(x_{\text{insitu},i} - \gamma x_{a,i})$ ”

1.514 and fig.11 legend: please explicitly precise that the uncertainty bars are given by appendix C6.

We have added:

“The calculation of each term and how they are combined for the error bars in Fig. 16 is detailed in Appendix C6.”

1.564: can you tell which way was used for each dataset?

We have added a footnote that points to the NOAA release notes describing this:

“The ObsPack release notes at [https://gml.noaa.gov/ccgg/obspack/release\\_notes.html#obspack\\_co2\\_1\\_GLOBALVIEWplus\\_v7.0\\_2021-08-18](https://gml.noaa.gov/ccgg/obspack/release_notes.html#obspack_co2_1_GLOBALVIEWplus_v7.0_2021-08-18) provide information on how to determine which data was fully recalibrated.”

1.582: for clarity reason, I would suggest to start a new sub-section dedicated to O2 decrease, as this is a different correction source (even if applied simultaneously with new XCO2 standard).

Since both changes are applied to the same data, we prefer to keep this as one section.

1.634: It is not clear in this paragraph whether the new product includes the variable O<sub>2</sub> variable fraction or not. The answer is given later in 1.692, with some redundancy, therefore I would discard the 1.634 paragraph.

This paragraph starts with “ $X_{\text{CO}_2}$ ,  $X_{\text{wCO}_2}$ , and  $X_{\text{lCO}_2}$  on the X2019 scale *and accounting for the variable O<sub>2</sub> mole fraction...*”; it explicitly says that both changes are incorporated in the product.

## Sect. 8

This chapter is very important and must be kept. But it is a long part in an already long paper, and a bit different from the remaining of the paper which explains the updates of GGG2020. I would suggest several solutions: (a) To place it in a dedicated companion paper. This can be merged with appendix B (which is small) or (b) (preferred) to move the text between 1.704 and 782 in appendix B. This part is largely an update of similar works by Wunch et al. 2015 (section 8), 2011 (appendix B).

Given the emphasis being placed on pushing uncertainties in and precision of remotely sensed GHG products to smaller and smaller values, especially in the next generation of space-based missions, understanding what the dominate sources of random uncertainty are is critical to guide future work. Therefore we prefer to leave this section where it is.

Text between 1.704 and 782 at least deserves its own sub-section

This text effectively is in its own subsection, since it is in the leading part of the overall section.

Please refer to Wunch et al. 2011 and Wunch et al. 2015 for section 8. In particular 1.776 & 777 can refer to Wunch et al. 2015 for more details on ME.

We added:

“Here we model two cases: a “shear” misalignment, where the modulation efficiency of the spectrometer increases linearly to 1.05 as a function of optical path difference, and an “angular” misalignment, where the modulation efficiency drops linearly to 0.95 as a function of optical path difference. **(See section 8 of Wunch et al. (2015) for more details on the mathematical forms for these misalignments.)**”

I would change the numeration of 8.x for x in 2,...,10 to 8.1.x.

Since these sections expand on the general comments in 8.1, we prefer to keep them as-is.

1.854: Please define this scale factors for HCl and how to use them to assess the ILS (or give a reference)

We added

“...largely independent of surface pressure or other atmospheric adjustments. Therefore, deviations of the HCl scale factors from 1 indicates a drift in ILS. To assess the...”

## Sect. 9

I think it would be more consistent to place this section at the beginning of document, either after 2 or after section 6.

Agreed, we have moved this after sect. 2.

## Typing corrections

Section 6.1 has no 6.x follower

That is intended.

Section 7.1.1 has no 7.1.x follower.

That is intended.

figures 8, 9, 11 and their font should be enlarged

We have increased the font size and rearranged the panels of fig 11 to allow each panel to be larger

l.1595: the link seems to be dead.

Corrected.

## References

- Gordon, I. E., Rothman, L. S., Hill, C., Kochanov, R. V., Tan, Y., Bernath, P. F., Birk, M., Boudon, V., Campargue, A., Chance, K., et al.: The HITRAN2016 molecular spectroscopic database, *J. Quant. Spectrosc. Ra.*, 203, 3–69, 2017.
- Hartmann, J.-M., Tran, H., and Toon, G.: Influence of line mixing on the retrievals of atmospheric CO<sub>2</sub> from spectra in the 1.6 and 2.1  $\mu\text{m}$  regions, *Atmos. Chem. Phys.*, 9, 7303–7312, 2009.
- Roche, S.: Measurements of Greenhouse Gases from Near-infrared Solar Absorption Spectra, Ph.D. thesis, University of Toronto, URL <http://hdl.handle.net/1807/108784>, 2021.
- Rodgers, C. D.: *Inverse Methods for Atmospheric Sounding Theory and Practice*, World Scientific Publishing Co. Pte. Ltd., 2000.
- Tran, H., Ngo, N. H., and Hartmann, J.-M.: Efficient computation of some speed-dependent isolated line profiles, *J. Quant. Spectrosc. Ra.*, 129, 199–203, 2013.

- Wunch, D., Toon, G. C., Wennberg, P. O., Wofsy, S. C., Stephens, B. B., Fischer, M. L., Uchino, O., Abshire, J. B., Bernath, P., Biraud, S. C., Blavier, J.-F. L., Boone, C., Bowman, K. P., Browell, E. V., Campos, T., Connor, B. J., Daube, B. C., Deutscher, N. M., Diao, M., Elkins, J. W., Gerbig, C., Gottlieb, E., Griffith, D. W. T., Hurst, D. F., Jiménez, R., Keppel-Aleks, G., Kort, E. A., Macatangay, R., Machida, T., Matsueda, H., Moore, F., Morino, I., Park, S., Robinson, J., Roehl, C. M., Sawa, Y., Sherlock, V., Sweeney, C., Tanaka, T., and Zondlo, M. A.: Calibration of the Total Carbon Column Observing Network using aircraft profile data, *Atmos. Meas. Tech.*, 3, 1351–1362, <https://doi.org/10.5194/amt-3-1351-2010>, 2010.
- Wunch, D., Toon, G. C., Blavier, J.-F. L., Washenfelder, R. A., Notholt, J., Connor, B. J., Griffith, D. W., Sherlock, V., and Wennberg, P. O.: The Total Carbon Column Observing Network, *Philosophical Transactions of the Royal Society A: Mathematical, Physical and Engineering Sciences*, 369, 2087–2112, <https://doi.org/10.1098/rsta.2010.0240>, 2011.
- Wunch, D., Toon, G. C., Sherlock, V., Deutscher, N. M., Liu, C., Feist, D. G., and Wennberg, P. O.: Documentation for the 2014 TCCON Data Release, <https://doi.org/10.14291/TCCON.GGG2014.DOCUMENTATION.R0/1221662>, 2015.
